# Supplementary material for: Propionate and butyrate dependent bacterial sulfate reduction at extremely haloalkaline conditions and description of Desulfobotulus alkaliphilus sp. nov
Source: PubMed Central journal article supplement — Extremophiles. 2009 Nov 4;14(1):71–7. doi: 10.1007/s00792-009-0288-5 (PMC2797415; doi:10.1007/s00792-009-0288-5), 2009-11-04
Supplement: 792_2009_288_MOESM1_ESM.pdf [file 792_2009_288_MOESM1_ESM.pdf]

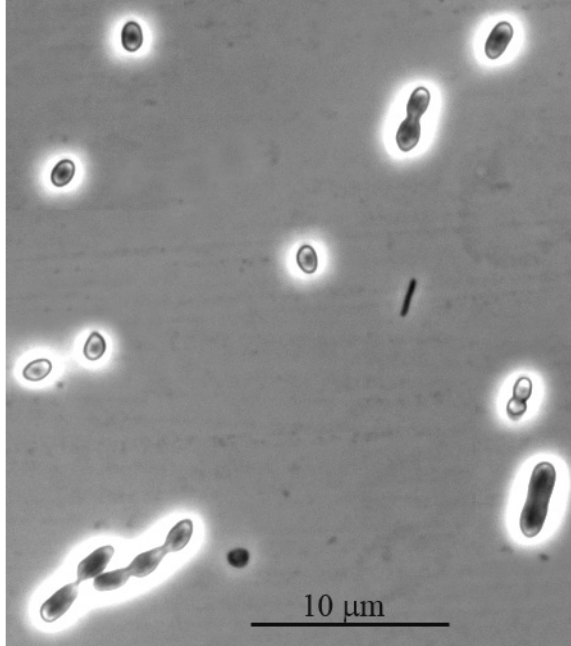

**Supplementary Figure.** Cell morphology of a highly enriched mixed culture from soda lake sediments oxidizing propionate in presence of sulfate.
